# Supplementary material
Source: publisher figshare collection journal article supplement (https://future-science-group.figshare.com/ndownloader/files/34261418)
Supplement: Supplementary file 1 [file 34261418]

## Sheet: Supplementary table1
EBV1_IgG in PBST, detAb in PBST					EBV1_IgG in PBST, detAb in PBST+BSA					EBV1_IgG in PBST, detAb in PBST+MP
pmol/well	300	150	60	30	pmol/well	300	150	60	30	pmol/well	300	150	60	30
BSA/unblocked	0.87	1.57	1.73	0.73	BSA/unblocked	1.21	1.93	0.85	0.84	BSA/unblocked	0.81	0.8	0.82	0.72
MP/unblocked	0.61	0.92	0.85	0.4	MP/unblocked	0.66	1.17	0.48	0.44	MP/unblocked	0.56	0.53	0.53	0.58
EBV2_IgG in PBST, detAb in PBST					EBV2_IgG in PBST, detAb in PBST+BSA					EBV2_IgG in PBST, detAb in PBST+MP
pmol/well	300	150	60	30	pmol/well	300	150	60	30	pmol/well	300	150	60	30
BSA/unblocked	0.66	0.63	0.69	0.44	BSA/unblocked	0.75	0.68	0.64	0.57	BSA/unblocked	0.59	0.65	0.63	0.61
MP/unblocked	0.41	0.32	0.23	0.2	MP/unblocked	0.45	0.37	0.34	0.32	MP/unblocked	0.39	0.39	0.38	0.42

## Sheet: Supplementary table2
pmol peptide/well	HighBind N- vs C-terminal immobilization	Maleimide N- vs C-terminal immobilization
600	0.6791	0.5836
300	0.7502	0.4014
150	0.9806	0.1358
60	0.0162	0.4136
30	0.0468	0.3119
15	0.0659	0.4725

## Sheet: supplementary figure1
			unit	reference						number of coupled peptides	new mass (Da)	new mass (BSA+spacer)		new mass (kDa)	new mass kDa(BSA+spacer)
	BSA (607 aa length)	66770	Da	estimated (110 Da/aa)					mass BSA-conjugate	1	70105.5	67043.3		70.1055	67.0433
										2	73441	67316.6		73.441	67.3166
	azido-PEG4	273.29	g/mol	manufacturer (Jena Biosciences)						3	76776.5	67589.9		76.7765	67.5899
	TTds spacer	117.1	g/mol	manufacturer (JPT peptide technologies)						4	80112	67863.2		80.112	67.8632
	peptide (16 aa length)	2832	Da	estimated (110 Da/aa)						5	83447.5	68136.4		83.4475	68.1364
	propargylglycine	113.11	g/mol	manufacturer (JPT peptide technologies)						6	86783	68409.7		86.783	68.4097
	sum spacer+linker+peptide	3335.5	Da							7	90118.5	68683		90.1185	68.683
										8	93454	68956.3		93.454	68.9563
										9	96789.5	69229.6		96.7895	69.2296
										10	100125	69502.9		100.125	69.5029
										11	103460	69776.2		103.46	69.7762
										12	106796	70049.5		106.796	70.0495
										13	110132	70322.8		110.132	70.3228
										14	113467	70596.1		113.467	70.5961
										15	116802	70869.4		116.802	70.8694
										16	120138	71142.6		120.138	71.1426
										17	123474	71415.9		123.474	71.4159
										18	126809	71689.2		126.809	71.6892
										19	130144	71962.5		130.144	71.9625
										20	133480	72235.8		133.48	72.2358
										21	136816	72509.1		136.815	72.5091
										22	140151	72782.4		140.151	72.7824
										23	143486	73055.7		143.487	73.0557
										24	146822	73329		146.822	73.329
										25	150158	73602.2		150.157	73.6022
										26	153493	73875.5		153.493	73.8755
										27	156828	74148.8		156.828	74.1488
										28	160164	74422.1		160.164	74.4221
										29	163500	74695.4		163.5	74.6954
										30	166835	74968.7		166.835	74.9687
										31	170170	75242		170.171	75.242
										32	173506	75515.3		173.506	75.5153
										33	176842	75788.6		176.841	75.7886
										34	180177	76061.9		180.177	76.0619
										35	183512	76335.1		183.512	76.3351
										36	186848	76608.4		186.848	76.6084
										37	190184	76881.7		190.184	76.8817
										38	193519	77155		193.519	77.155
										39	196854	77428.3		196.855	77.4283
										40	200190	77701.6		200.19	77.7016
										41	203526	77974.9		203.525	77.9749
										42	206861	78248.2		206.861	78.2482
										43	210196	78521.5		210.196	78.5215
										44	213532	78794.8		213.532	78.7948
										45	216868	79068.1		216.868	79.068
										46	220203	79341.3		220.203	79.3413
										47	223538	79614.6		223.538	79.6146
										48	226874	79887.9		226.874	79.8879
										49	230210	80161.2		230.209	80.1612
										50	233545	80434.5		233.545	80.4345
										51	236880	80707.8		236.881	80.7078
										52	240216	80981.1		240.216	80.9811
										53	243552	81254.4		243.552	81.2544
										54	246887	81527.7		246.887	81.5277
										55	250222	81800.9		250.222	81.801
										56	253558	82074.2		253.558	82.0742
										57	256894	82347.5		256.894	82.3475
										58	260229	82620.8		260.229	82.6208
										59	263564	82894.1		263.565	82.8941
										60	266900	83167.4		266.9	83.1674
										61	270236	83440.7		270.236	83.4407
										62	273571	83714		273.571	83.714
										63	276906	83987.3		276.906	83.9873
										64	280242	84260.6		280.242	84.2606
										65	283578	84533.9		283.577	84.5339
										66	286913	84807.1		286.913	84.8071
										67	290248	85080.4		290.248	85.0804
										68	293584	85353.7		293.584	85.3537
										69	296920	85627		296.92	85.627
										70	300255	85900.3		300.255	85.9003
										71	303590	86173.6		303.591	86.1736
										72	306926	86446.9		306.926	86.4469
										73	310262	86720.2		310.262	86.7202
										74	313597	86993.5		313.597	86.9935
										75	316932	87266.8		316.933	87.2668
										76	320268	87540		320.268	87.54
										77	323604	87813.3		323.603	87.8133
										78	326939	88086.6		326.939	88.0866
										79	330274	88359.9		330.274	88.3599
										80	333610	88633.2		333.61	88.6332
										81	336946	88906.5		336.945	88.9065
										82	340281	89179.8		340.281	89.1798
										83	343616	89453.1		343.616	89.4531
										84	346952	89726.4		346.952	89.7264
										85	350288	89999.6		350.288	89.9996
										86	353623	90272.9		353.623	90.2729
										87	356958	90546.2		356.959	90.5462
										88	360294	90819.5		360.294	90.8195
										89	363630	91092.8		363.63	91.0928
										90	366965	91366.1		366.965	91.3661
										91	370300	91639.4		370.3	91.6394
										92	373636	91912.7		373.636	91.9127
										93	376972	92186		376.971	92.186
										94	380307	92459.3		380.307	92.4593
										95	383642	92732.5		383.642	92.7325
										96	386978	93005.8		386.978	93.0058
										97	390314	93279.1		390.313	93.2791
										98	393649	93552.4		393.649	93.5524
										99	396984	93825.7		396.985	93.8257
										100	400320	94099		400.32	94.099
										101	403656	94372.3		403.656	94.3723
										102	406991	94645.6		406.991	94.6456
										103	410326	94918.9		410.327	94.9189
										104	413662	95192.2		413.662	95.1922
										105	416998	95465.4		416.998	95.4655
										106	420333	95738.7		420.333	95.7387
										107	423668	96012		423.668	96.012
										108	427004	96285.3		427.004	96.2853
										109	430340	96558.6		430.339	96.5586
										110	433675	96831.9		433.675	96.8319
										111	437010	97105.2		437.01	97.1052
										112	440346	97378.5		440.346	97.3785
										113	443682	97651.8		443.682	97.6518
										114	447017	97925.1		447.017	97.9251
										115	450352	98198.3		450.353	98.1983
										116	453688	98471.6		453.688	98.4716
										117	457024	98744.9		457.024	98.7449
										118	460359	99018.2		460.359	99.0182
										119	463694	99291.5		463.695	99.2915
										120	467030	99564.8		467.03	99.5648
										121	470366	99838.1		470.365	99.8381
										122	473701	100111		473.701	100.111
										123	477036	100385		477.036	100.385
										124	480372	100658		480.372	100.658
										125	483708	100931		483.707	100.931
										126	487043	101205		487.043	101.205
										127	490378	101478		490.378	101.478
										128	493714	101751		493.714	101.751
										129	497050	102024		497.05	102.024
										130	500385	102298		500.385	102.298
										131	503720	102571		503.721	102.571
										132	507056	102844		507.056	102.844
										133	510392	103118		510.392	103.118
										134	513727	103391		513.727	103.391
										135	517062	103664		517.062	103.664
										136	520398	103937		520.398	103.937
										137	523734	104211		523.734	104.211
										138	527069	104484		527.069	104.484
										139	530404	104757		530.404	104.757
										140	533740	105031		533.74	105.031
										141	537076	105304		537.076	105.304
										142	540411	105577		540.411	105.577
										143	543746	105850		543.746	105.85
										144	547082	106124		547.082	106.124
										145	550418	106397		550.418	106.397
										146	553753	106670		553.753	106.67
